# Supplementary material for: Herbal Additives Substantially Modify Antioxidant Properties and Tocopherol Content of Cold-Pressed Oils
Source: MDPI journal article supplement (doi:10.3390/antiox10050781), 2021-05-14
Supplement: s1 [file s1]

## Supplementary Materials:

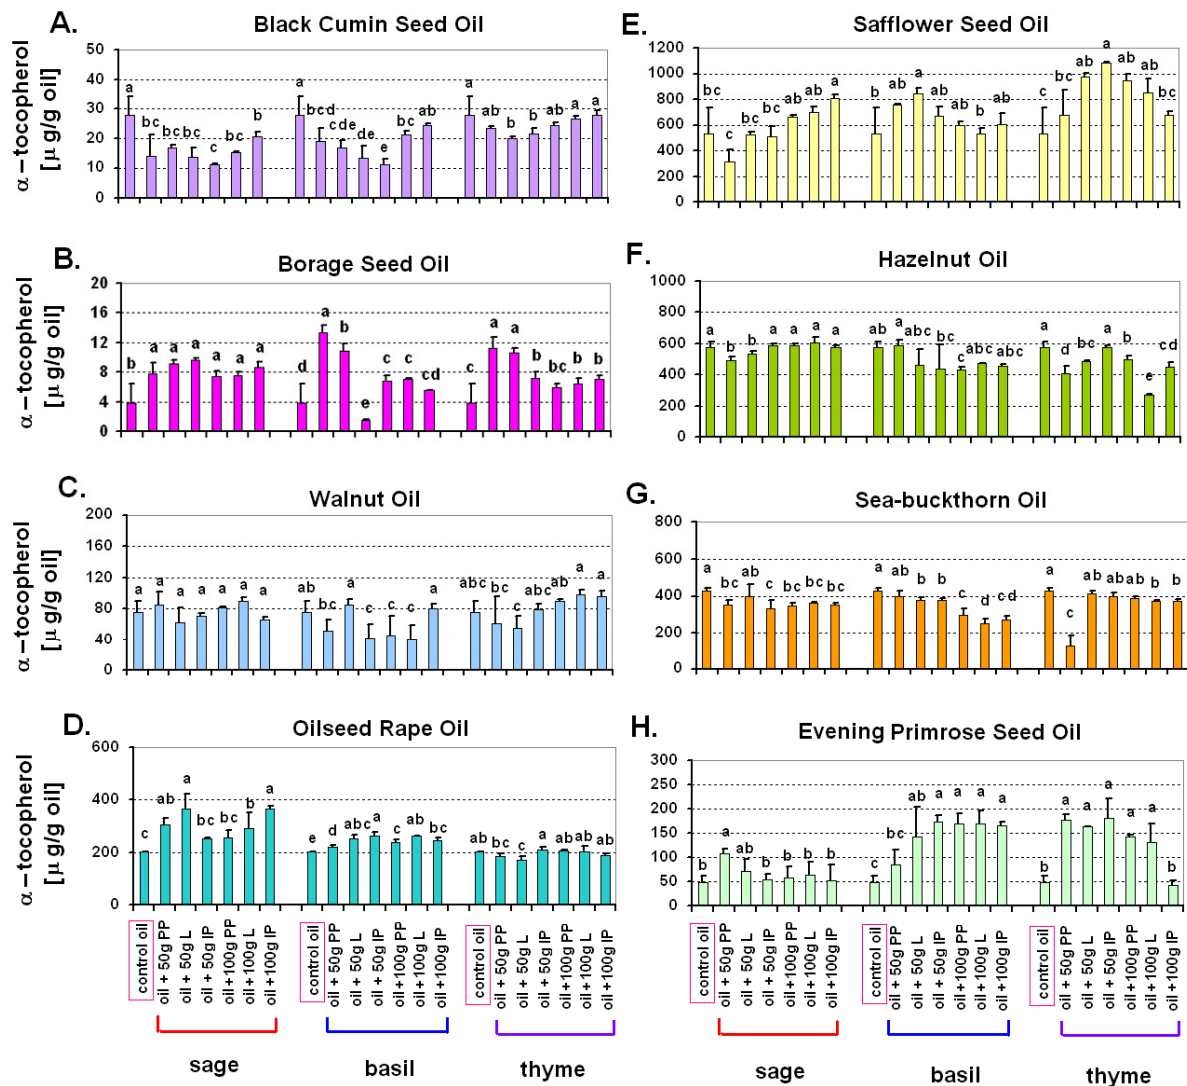

**Figure S1:** The impact of the addition of herbs (sage—*Salvia officinalis* L., basil—*Ocimum basilicum* L., thyme—*Thymus vulgaris* L.) on α-tocopherol content in oils cold-pressed from seeds of eight different species. Control oil – cold-pressed oil without any additives. Values marked with the same letters are not significantly different according to the Duncan test ( $p$  0.05); statistical analyses made separately for individual herbs. PP – aerial plant part cut into pieces; L – leaves only; IP – intact aerial plant part.

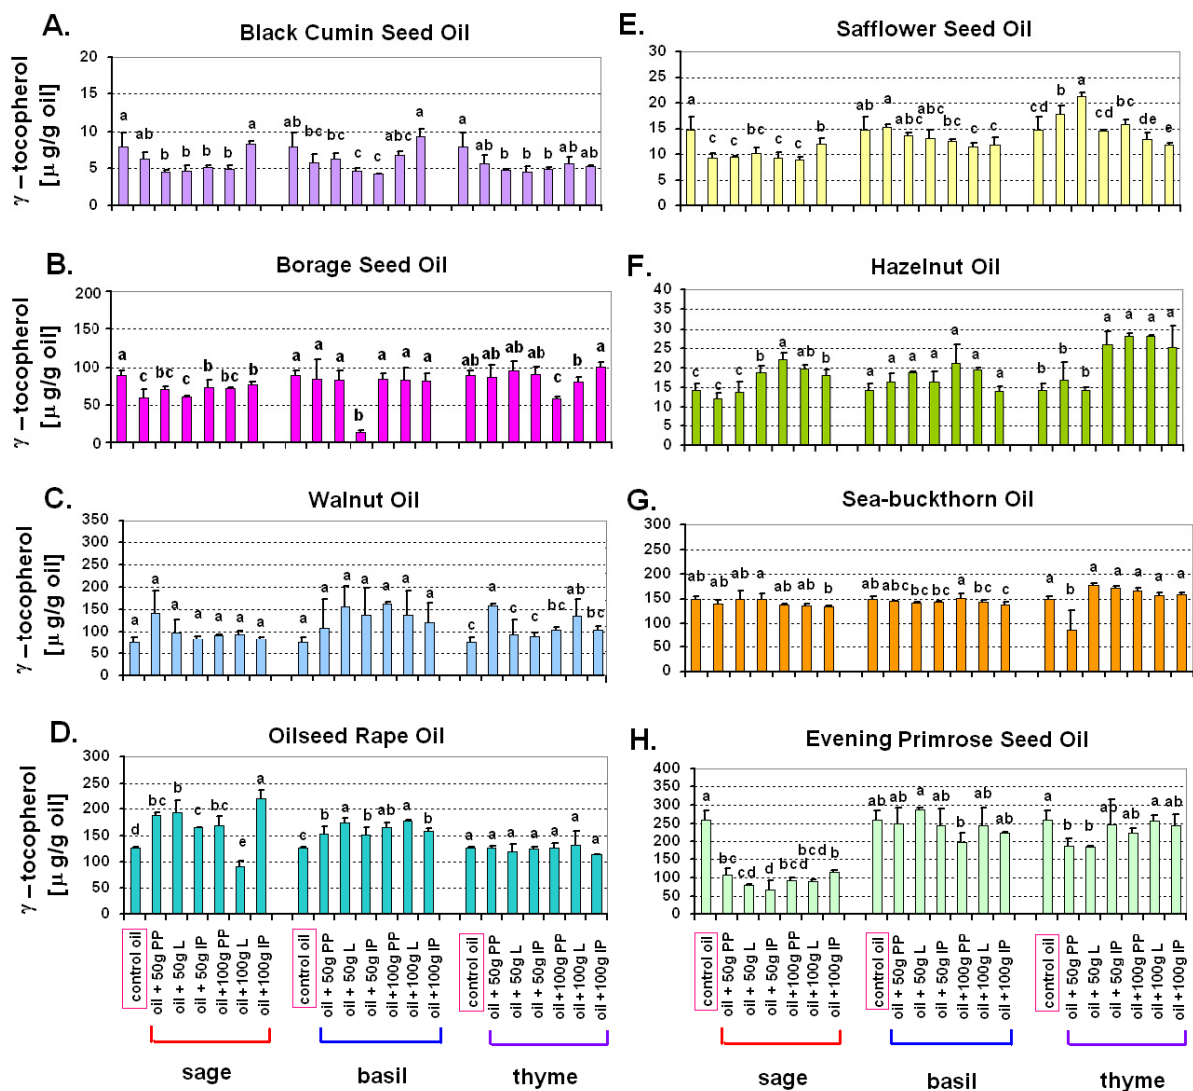

**Figure S2:** The impact of the addition of herbs (sage—*Salvia officinalis* L., basil—*Ocimum basilicum* L., thyme—*Thymus vulgaris* L.) on  $\gamma$ -tocopherol content in oils cold-pressed from seeds of eight different species. Control oil – cold-pressed oil without any additives. Values marked with the same letters are not significantly different according to the Duncan test ( $p$  0.05); statistical analyses made separately for individual herbs. PP—airial plant part cut into pieces; L—leaves only; IP—intact aerial plant part.

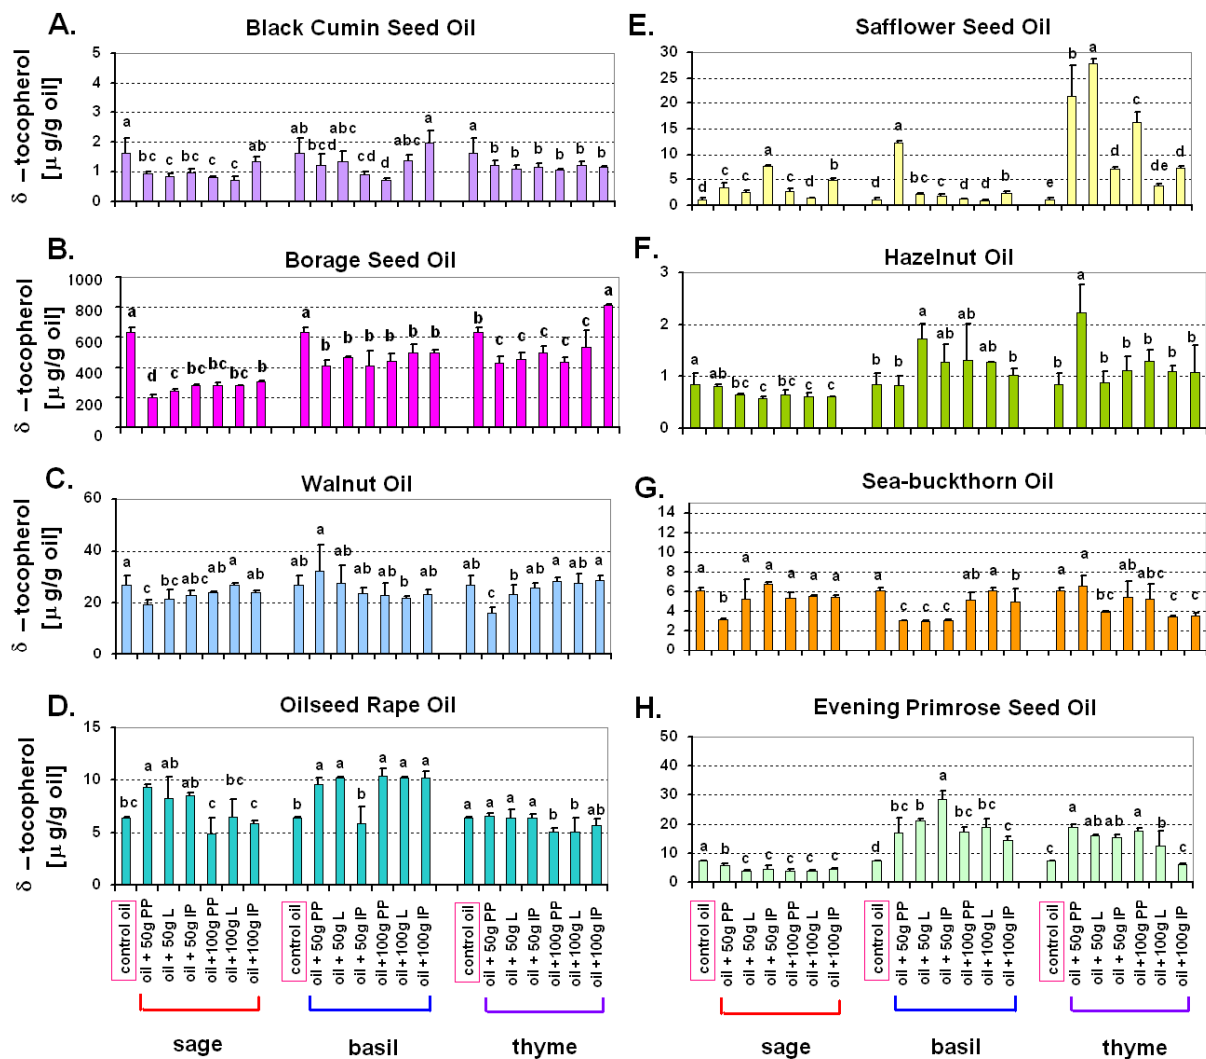

**Figure S3:** The impact of the addition of herbs (sage—*Salvia officinalis* L., basil—*Ocimum basilicum* L., thyme—*Thymus vulgaris* L.) on  $\delta$ -tocopherol in oils cold-pressed from seeds of eight different species. Control oil – cold-pressed oil without any additives. Values marked with the same letters are not significantly different according to the Duncan test ( $p$  0.05); statistical analyses made separately for individual herbs. PP—aerial plant part cut into pieces; L—leaves only; IP—intact aerial plant part.

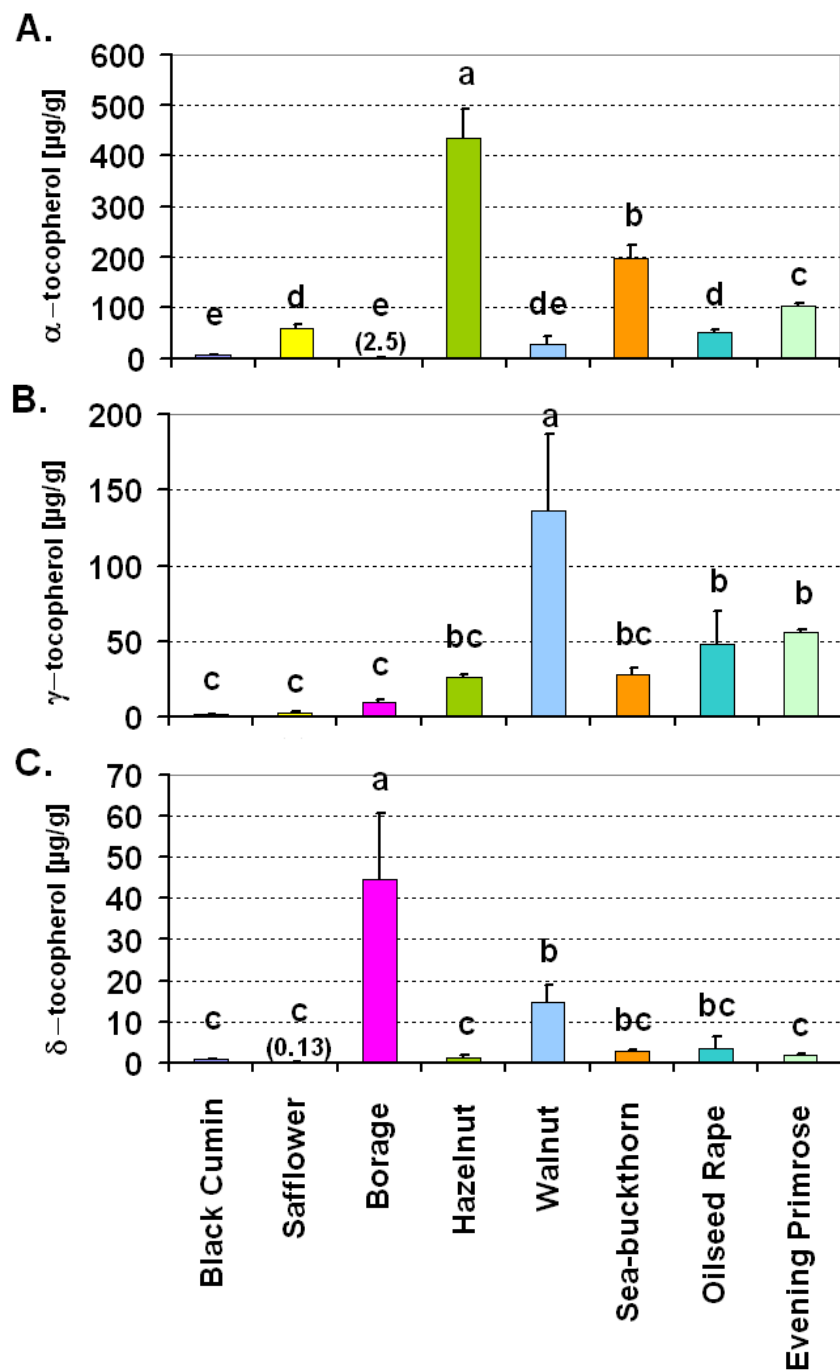

**Figure S4:** Contents of  $\alpha$ -tocopherol (A),  $\gamma$ -tocopherol (B) and  $\delta$ -tocopherol (C) in oil cakes of eight species after cold-press of oil. Values marked with the same letters are not significantly different according to the Duncan test ( $p$  0.05). Extremely low values are provided in parenthesis.

**Table 1.** The impact of addition of herbs on total content (sum) of essential oils [ $\mu\text{g/g}$ ] in oils cold-pressed from eight plant species—preliminary analysis.

| Oil + added herb                          | Black Cumin Seed Oil | Safflower Seed Oil | Borage Seed Oil | Hazlenut Oil | Walnut Oil | See-Buckthorn Seed Oil | Oilseed Rape Oil | Evening Primrose Seed Oil |
|-------------------------------------------|----------------------|--------------------|-----------------|--------------|------------|------------------------|------------------|---------------------------|
| Oil                                       | 16920                | 9                  | 3               | 4            | 65         | 12                     | 12               | 9                         |
| Oil + <i>Salvia officinalis</i> L. 50 PP  | 15444                | 159                | 46              | 127          | 155        | 79                     | 93               | 50                        |
| Oil + <i>Salvia officinalis</i> L. 50 L   | 17359                | 244                | 72              | 120          | 155        | 84                     | 200              | 80                        |
| Oil + <i>Salvia officinalis</i> L. 50 IP  | 14944                | 197                | 73              | 96           | 114        | 77                     | 123              | 57                        |
| Oil + <i>Salvia officinalis</i> L. 100 PP | 17192                | 75                 | 175             | 188          | 290        | 120                    | 306              | 175                       |
| Oil + <i>Salvia officinalis</i> L. 100 L  | 12836                | 89                 | 162             | 263          | 262        | 128                    | 307              | 216                       |
| Oil + <i>Salvia officinalis</i> L. 100 IP | 12926                | 75                 | 205             | 241          | 198        | 127                    | 280              | 138                       |
| Oil                                       | 16920                | 9                  | 3               | 4            | 65         | 12                     | 12               | 9                         |
| Oil + <i>Ocimum basillicum</i> L. 50 PP   | 20985                | 113                | 125             | 68           | 233        | 124                    | 139              | 169                       |
| Oil + <i>Ocimum basillicum</i> L. 50 L    | 21401                | 191                | 169             | 77           | 246        | 110                    | 177              | 208                       |
| Oil + <i>Ocimum basillicum</i> L. 50 IP   | 21128                | 158                | 131             | 52           | 121        | 120                    | 134              | 153                       |
| Oil + <i>Ocimum basillicum</i> L. 100 PP  | 19119                | 190                | 231             | 118          | 316        | 175                    | 313              | 260                       |
| Oil + <i>Ocimum basillicum</i> L. 100 L   | 17987                | 325                | 344             | 115          | 332        | 197                    | 294              | 330                       |
| Oil + <i>Ocimum basillicum</i> L. 100 IP  | 18368                | 271                | 280             | 103          | 328        | 159                    | 198              | 220                       |
| Oil                                       | 16920                | 9                  | 3               | 4            | 65         | 12                     | 12               | 9                         |
| Oil + <i>Thymus vulgaris</i> L. 50 PP     | 16225                | 210                | 289             | 76           | 65         | 155                    | 61               | 219                       |
| Oil + <i>Thymus vulgaris</i> L. 50 L      | 16198                | 210                | 212             | 68           | 59         | 148                    | 158              | 190                       |
| Oil + <i>Thymus vulgaris</i> L. 50 IP     | 15923                | 251                | 180             | 75           | 62         | 154                    | 108              | 252                       |
| Oil + <i>Thymus vulgaris</i> L. 100 PP    | 12394                | 394                | 533             | 273          | 83         | 52                     | 248              | 389                       |
| Oil + <i>Thymus vulgaris</i> L. 100 L     | 12585                | 396                | 378             | 170          | 93         | 55                     | 203              | 387                       |
| Oil + <i>Thymus vulgaris</i> L. 100 IP    | 13664                | 480                | 292             | 165          | 80         | 51                     | 176              | 410                       |

Essential oils measured by modified method described by modified method of Silva-Flores et al. [77]. Control oil – cold-pressed oil without any additives. PP—aerial plant part cut into pieces, L—leaves only; IP—intact aerial plant part, 50–50 g of plant material, 100–100 g of plant material.
